# Supplementary material for: Local Stabilization of Hypoxia-Inducible Factor-1α Controls Intestinal Inflammation via Enhanced Gut Barrier Function and Immune Regulation
Source: PubMed Central journal article supplement (PMC7840603; doi:10.3389/fimmu.2020.609689), 2021-01-14
Supplement: DataSheet_1.pdf [file DataSheet_1.pdf]

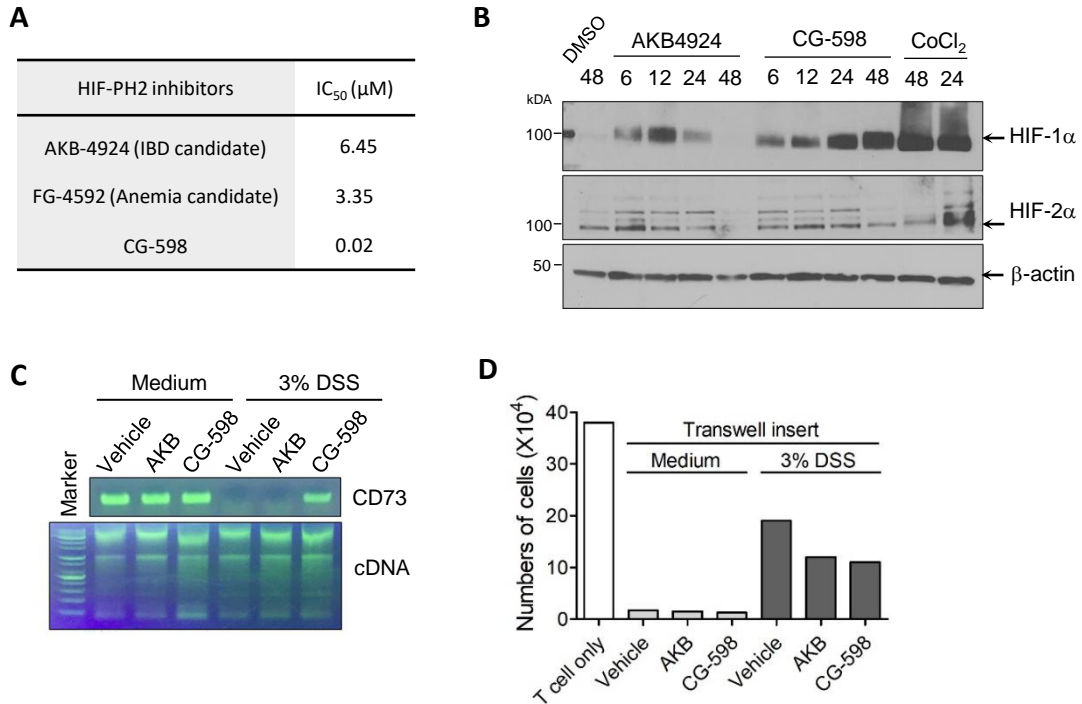

**Supplementary Figure 1. CG-598 enhances CD73 expression and reduces T-cell migration through in intestinal epithelial cells.** (A) IC<sub>50</sub> values for inhibition of HIF-PH2 enzyme. Results of HIF-PH2 activity assays for tested compounds using FP methods. Assay of each sample well was performed in duplicate and the assay was repeated three times independently with similar results. (B) HeLa cells were treated with 10 μM AKB4924, CG-598, or CoCl<sub>2</sub> for 6, 12, 24, 48 h. Whole cell extracts from each treatment group were analyzed to detect HIF-1α and HIF-1β. (C) HCT116 cells were pre-treated with 10 μM AKB4924 or 10 μM CG-598 for 2 h and further incubated 3% DSS for 24 h. After incubation, cells were harvested for total RNA extraction followed by PCR. The mRNA level of CD73 and total RNA were detected by 1% agarose gel. (D) For T-cell migration assays, Caco-2 cell monolayers, grown in 24-transwell plates, were treated with AKB4924 or CG-598 for 1 h and cells were further incubated with 3% DSS for 72 h. Jurkat T-cells were then added to each plate. After incubation for 24 h, the number of Jurkat T-cells that passed through the transwell chamber was counted. All treatments were performed in triplicate and each assay was repeated two times independently with similar results.

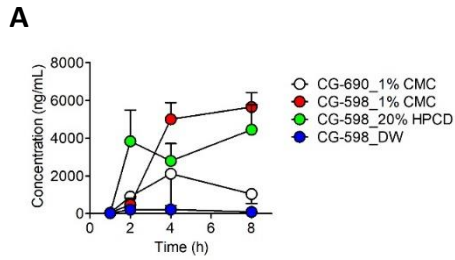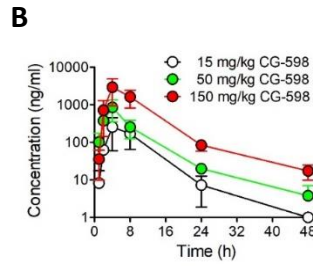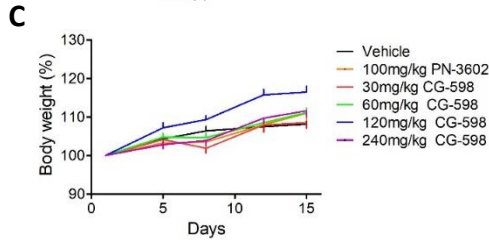

**D**

|                  | RBC<br>( $\times 10^6$ cells/ $\mu$ l) | Hemoglobin<br>(g/dl) | Reticulocyte<br>( $\times 10^9$ cells/L) | Reticulocyte<br>(%) |
|------------------|----------------------------------------|----------------------|------------------------------------------|---------------------|
| Vehicle          | 8.91 $\pm$ 0.804                       | 14.4 $\pm$ 1.125     | 317.66 $\pm$ 35.351                      | 3.59 $\pm$ 0.493    |
| PN-3602 100mg/kg | $\geq$ 11.89                           | $\geq$ 22.1          | $\geq$ 1788.1                            | $\geq$ 15.04        |
| CG-598 30mg/kg   | 8.79 $\pm$ 0.399                       | 14.62 $\pm$ 0.622    | 332.66 $\pm$ 74.120                      | 3.78 $\pm$ 0.822    |
| CG-598 60mg/kg   | 8.87 $\pm$ 0.246                       | 14.8 $\pm$ 0.469     | 339.82 $\pm$ 60.796                      | 3.83 $\pm$ 0.692    |
| CG-598 120mg/kg  | 8.77 $\pm$ 0.170                       | 14.72 $\pm$ 0.487    | 338.38 $\pm$ 65.832                      | 3.86 $\pm$ 0.761    |
| CG-598 240mg/kg  | 9.482 $\pm$ 0.108                      | 16.08 $\pm$ 0.545    | 340.32 $\pm$ 45.665                      | 3.59 $\pm$ 0.473    |

(Mean $\pm$ SEM)

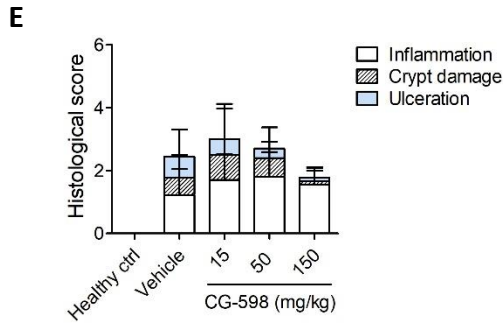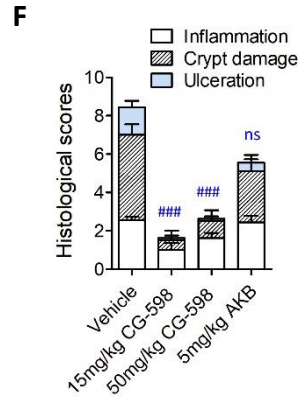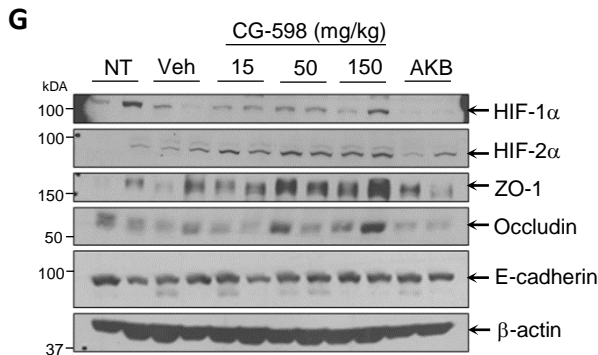

**Supplementary Figure 2. Assessment of gut distribution and hematologic effects of CG-598.**

(A) Mice were orally administered 50 mg/kg CG-598 or CG-690, the other candidate of HIF-PH inhibitor (n=3). Various compositions of vehicle media were tested for efficient delivery of drug. The concentrations of CG-598 from intestinal tissue homogenates were determined at each indicated time point. (B) Mice were treated with three oral doses of CG-598 resuspended in 1% CMC (n=4). The concentrations of CG-598 from intestinal tissue homogenates were determined at each indicated time point. (C) Mice were orally administered the indicated doses of CG-598 or PN-3602, a candidate for anemia therapeutics, once a day for 15 days (n=5). Body weights of mice were monitored every four days. (D) RBC hematology following 15 days treatment orally once a day. (E) Cumulative histologic scores including inflammation, crypt damage, and ulceration in the DNBS-induced colitis (related to Figure 3D) and (F) DSS-induced colitis (related to Figure 4E). (G) Mice were fed with 2.5% DSS in drinking water for five days and changed to normal water afterwards (n=2 per group). Mice were treated with CG-598 (15/50/150 mg/kg) or AKB4924 (5 mg/kg) by oral gavage once every day. At day 11, colon tissue homogenates were analyzed to detect protein levels HIFs, ZO-1, occludin and E-cadherin.

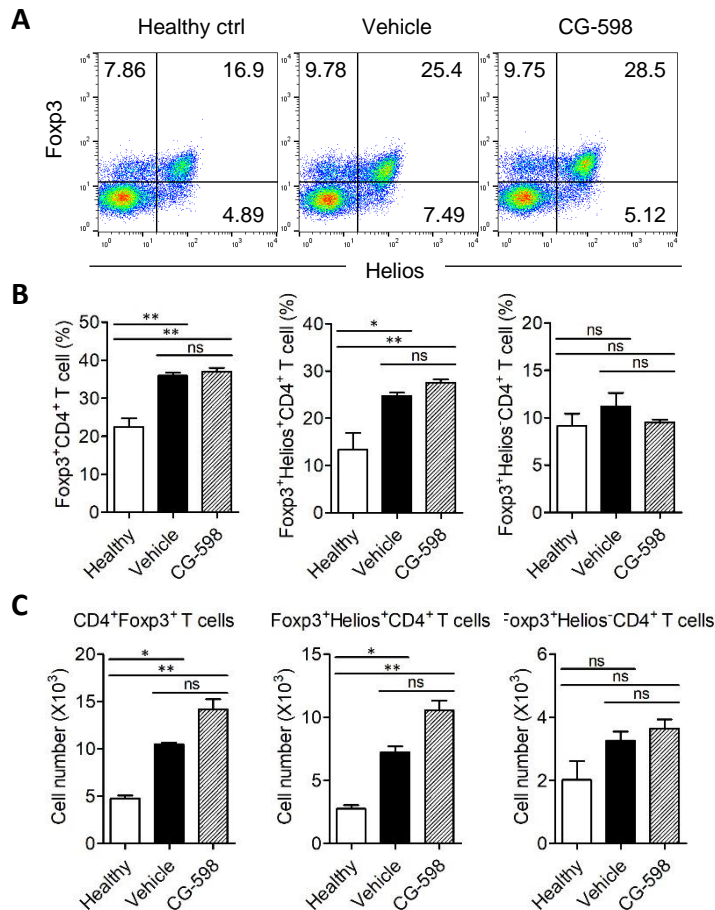

**Supplementary Figure 3. Analysis of thymic versus peripheral Tregs following oral CG-598 treatment in the lamina propria of colon under DSS-induced colitis.** Mice were fed with 2.5% DSS in drinking water for five days and followed by normal drinking water afterwards. Mice were treated with 15 mg/kg CG-598 by oral gavage once every day (n=3 per group). At day 11, CD4<sup>+</sup> T-cells were isolated from the lamina propria of colon and analyzed for expression of Fopx3 and Helios. (A) Representative flow cytometry histogram of colon Tregs. (B) Percentages of the Fopx3<sup>+</sup> population for each Treg subset including thymic (Fopx3<sup>+</sup>Helios<sup>+</sup>) and peripheral (Fopx3<sup>+</sup>Helios<sup>-</sup>) Tregs among CD4<sup>+</sup> T-cells. (C) Absolute cell number of Tregs. One-way ANOVA. ns: not significant, \**p*<0.05, \*\**p*<0.01.

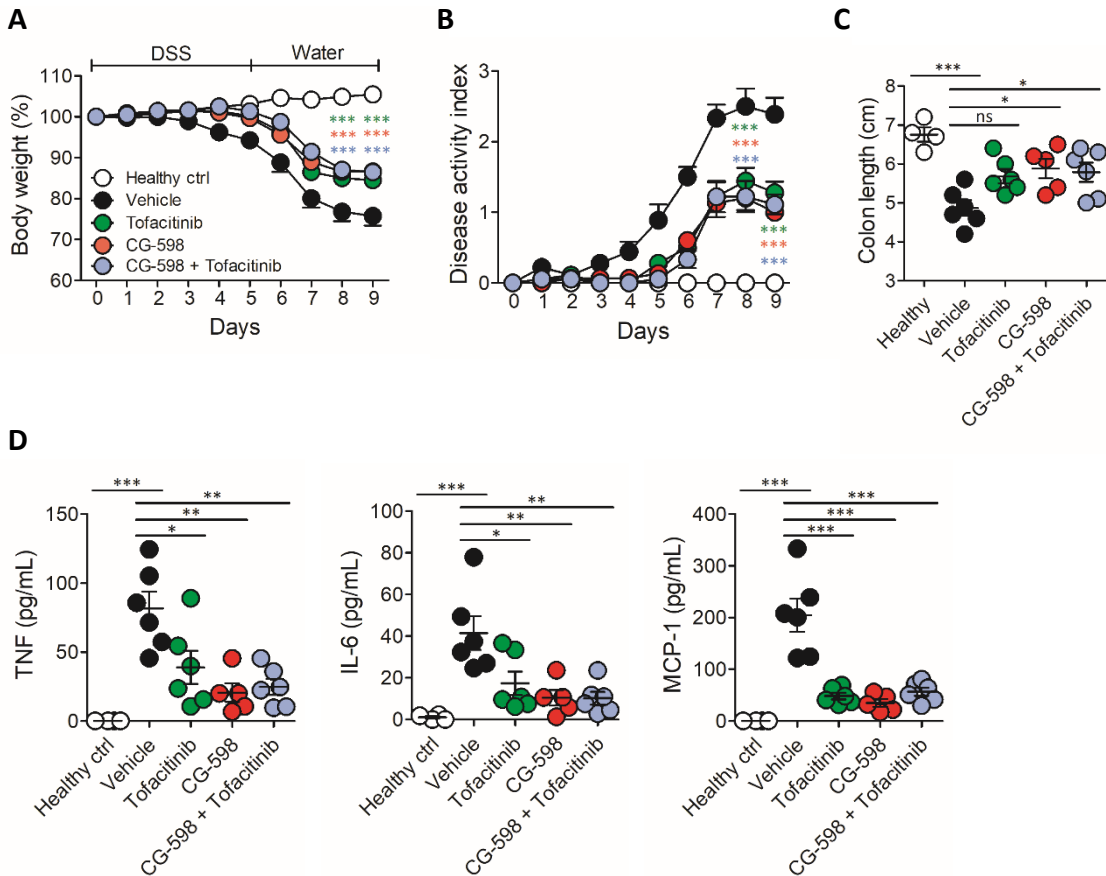

**Supplementary Figure 4. Effect of CG-598 compared with tofacitinib in DSS-induced colitis.** Mice were fed with 2.5% DSS in drinking water for five days followed by drinking water through the end of the experiment (n=6 per group). Mice were treated with 15 mg/kg CG-598 or 30 mg/kg tofacitinib by oral gavage once every day. (A) Body weight and (B) Disease activity index following DSS treatment. (C) Colon length at day 9. (D) Cytokines from colon tissue homogenates. One-way ANOVA. ns: not significant, \* $p < 0.05$ , \*\* $p < 0.01$ , \*\*\* $p < 0.001$ , compared to vehicle group.

**Figure 5B**

| CT value  | E-cadherin | GAPDH    |
|-----------|------------|----------|
| Control 1 | 26.89552   | 20.92582 |
| Control 2 | 26.93275   | 20.76834 |
| Control 3 | 27.16371   | 21.39131 |
| Control 4 | 27.43556   | 21.15337 |
| Control 5 | 26.47294   | 21.22183 |
| Control 6 | 26.87642   | 20.97088 |
| Vehicle 1 | 27.316     | 20.49914 |
| Vehicle 2 | 27.03803   | 20.56634 |
| Vehicle 3 | 26.06874   | 20.91327 |
| Vehicle 4 | 25.9715    | 20.79469 |
| Vehicle 5 | 26.85239   | 19.49039 |
| Vehicle 6 | 26.63154   | 19.75019 |
| CG 1      | 24.98121   | 20.65367 |
| CG 2      | 24.84589   | 20.37766 |
| CG 3      | 24.7295    | 20.74452 |
| CG 4      | 24.79625   | 20.64667 |
| CG 5      | 25.50682   | 19.24098 |
| CG 6      | 24.77723   | 19.87876 |

**Figure 5C, F**

| CT value  | IL-22    | ITF      | GAPDH    |
|-----------|----------|----------|----------|
| Control 1 | 31.07687 | 18.26261 | 20.9332  |
| Control 2 | 30.89129 | 18.19223 | 20.47389 |
| Control 3 | 30.94457 | 18.93028 | 20.76508 |
| Control 4 | 30.73747 | 18.88767 | 20.86839 |
| Control 5 | 31.04768 | 18.71993 |          |
| Control 6 | 31.00052 | 19.01255 |          |
| Vehicle 1 | 29.057   | 17.7887  | 20.32671 |
| Vehicle 2 | 28.98937 | 17.67456 | 20.19308 |
| Vehicle 3 | 30.32467 | 17.7277  | 19.15499 |
| Vehicle 4 | 30.1562  | 17.83411 | 19.23316 |
| Vehicle 5 | 30.53607 | 18.29251 | 20.67116 |
| Vehicle 6 | 29.9906  | 18.25486 | 20.72875 |
| CG 1      | 28.65343 | 18.07447 | 20.82958 |
| CG 2      | 28.889   | 17.49867 | 20.68835 |
| CG 3      | 28.83602 | 17.52189 | 20.38857 |
| CG 4      | 28.40497 | 17.6031  | 20.64426 |
| CG 5      | 28.91822 | 17.98535 | 19.07424 |
| CG 6      | 28.94828 | 17.80934 | 18.84052 |

**Figure 5E**

| CT value  | MUC2     | MUC3     | GAPDH    |
|-----------|----------|----------|----------|
| Control 1 | 22.14519 | 21.9731  | 21.94005 |
| Control 2 | 22.42817 | 22.07063 | 21.79252 |
| Control 3 | 22.13031 | 22.45987 | 21.99211 |
| Control 4 | 22.47602 | 22.38256 | 21.88435 |
| Control 5 | 22.97055 | 22.07146 | 22.01967 |
| Control 6 | 22.3414  | 21.93052 | 22.07758 |
| Vehicle 1 | 20.34395 | 19.00018 | 20.32943 |
| Vehicle 2 | 20.07287 | 19.80774 | 20.44467 |
| Vehicle 3 | 19.15178 | 19.80328 | 19.12868 |
| Vehicle 4 | 19.04501 | 19.63028 | 19.38806 |
| Vehicle 5 | 20.79965 | 19.58429 | 20.79708 |
| Vehicle 6 | 20.66042 | 19.40264 | 20.57691 |
| CG 1      | 18.99059 | 19.42388 | 20.87402 |
| CG 2      | 18.78204 | 19.33606 | 20.78655 |
| CG 3      | 19.92596 | 19.14211 | 20.44149 |
| CG 4      | 19.60381 | 18.97381 | 20.70068 |
| CG 5      | 19.74053 | 19.23822 | 19.19869 |
| CG 6      | 19.51825 | 19.36258 | 18.96017 |

**Figure 5H**

| CT value  | IL-10        | GAPDH    |
|-----------|--------------|----------|
| Control 1 | 35.74482     | 20.79699 |
| Control 2 | 35.7414      | 20.35106 |
| Control 3 | 35.79026     | 20.93805 |
| Control 4 | Undetermined | 20.87875 |
| Control 5 | 35.78737     | 20.96749 |
| Control 6 | 35.9786      | 20.72176 |
| Vehicle 1 | 35.91122     | 20.27353 |
| Vehicle 2 | 36.01833     | 20.21009 |
| Vehicle 3 | 35.92091     | 20.21006 |
| Vehicle 4 | 35.94637     | 20.24221 |
| Vehicle 5 | 35.55281     | 20.67904 |
| Vehicle 6 | 35.43143     | 20.81218 |
| CG 1      | 34.70583     | 20.45695 |
| CG 2      | 34.96812     | 20.19351 |
| CG 3      | 34.70749     | 20.34944 |
| CG 4      | 34.54656     | 20.38926 |
| CG 5      | 34.92702     | 19.53917 |
| CG 6      | 34.88707     | 19.72522 |

**Supplementary Table 1. RT-PCR gene expression data sets of main Figure 5.**
